# Supplementary material for: Comprehensive Analysis of Titanium Oxide Nanoparticle Size and Surface Properties on Neuronal PC-12 Cells: Unraveling Cytotoxicity, Dopaminergic Gene Expression, and Acetylcholinesterase Inhibition
Source: MDPI journal article supplement (doi:10.3390/jox13040043), 2023-11-07

## SUPPLEMENTARY DATA

### Comprehensive Analysis of Titanium Oxide Nanoparticle Size and Surface Properties on Neuronal PC-12 Cells: Unraveling Cytotoxicity, Dopaminergic Gene Expression, and Acetylcholinesterase Inhibition

1. Figure S1. X-Ray diffraction pattern of pure PVP powder.

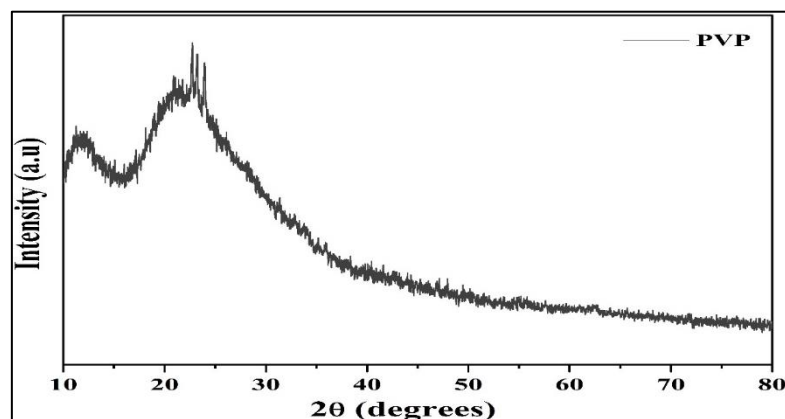

2. Figure S2. FTIR spectra of pure PVP powder.

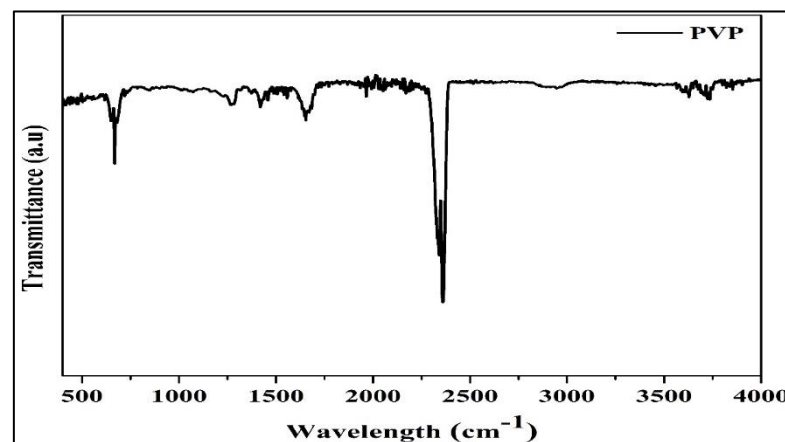

3. Supplementary Table S1. List of primers for gene expression studies.

| Primer Name                             | Primer Sequence 5' --> 3' |
|-----------------------------------------|---------------------------|
| Tyrosine hydroxylase (Th)- 1F           | CCTTCCAGTACAAGCACGGT      |
| Tyrosine hydroxylase (Th)- 1R           | TGGGTAGCATAGAGGCCCTT      |
| Monoamine oxidase A (Maoa)- 1F          | GAACCCGAGTCCAAGGATGT      |
| Monoamine oxidase A (Maoa)- 1R          | ATGGCCCAAACCATAGGCTG      |
| Catechol-O-methyltransferase (Comt)- 1F | GTAAAAACCCGTGTCTGCGG      |
| Catechol-O-methyltransferase (Comt)- 1R | CATGATTTGGCCTTTCGCGT      |
| $\alpha$ -synuclein 1 F                 | GACCAGATGGGCAAGGGTGA      |
| $\alpha$ -synuclein 1R                  | CATAAGCCTCACTGCTAGGGT     |
| GPCR-37 -1F                             | CAACCTCGCTTTCTGGGACT      |
| GPCR-37 -1R                             | ACCCAGAGAAGCTACCTCGATA    |
| Parkin -1F                              | CGGGACTGCAAGGAAGCATA      |

|           |                      |
|-----------|----------------------|
| Parkin-1R | CCGGTATGCCTGAGAAGTCG |
|-----------|----------------------|

4. Supplementary Table S2: Data for validation of TiO<sub>2</sub> NP's concentration by Flame Atomic Absorption Spectroscopic Assay.

(a) Method settings.

| Replicates                                | 3 Sample Uptake |
|-------------------------------------------|-----------------|
| Time (s)                                  | 40              |
| Calibration Correlation Coefficient Limit | 0.999           |
| fast pump                                 | On              |
| Pump Speed (rpm)                          | 15              |
| Blank Subtraction                         | On              |
| Sample Introduction                       | Autosampler     |
| Stabilization Time (s)                    | 30              |
| Element                                   | Ti              |
| Label Wavelength (nm)                     | 498.73          |
| Calibration Fit                           | Linear Weighted |
| Nebulizer Pressure (kPa)                  | 240             |

(b) Calibration Curve.

| Sample     | Concentration ((μg/ml) | Intensity |
|------------|------------------------|-----------|
| Blank      | 0                      | 0.00      |
| Standard 1 | 0.5                    | 108.30    |
| Standard 2 | 1                      | 233.58    |
| Standard 3 | 5                      | 1080.98   |
| Standard 4 | 10                     | 2316.57   |
| Standard 5 | 50                     | 1160.29   |
| Standard 6 | 100                    | 23550.03  |

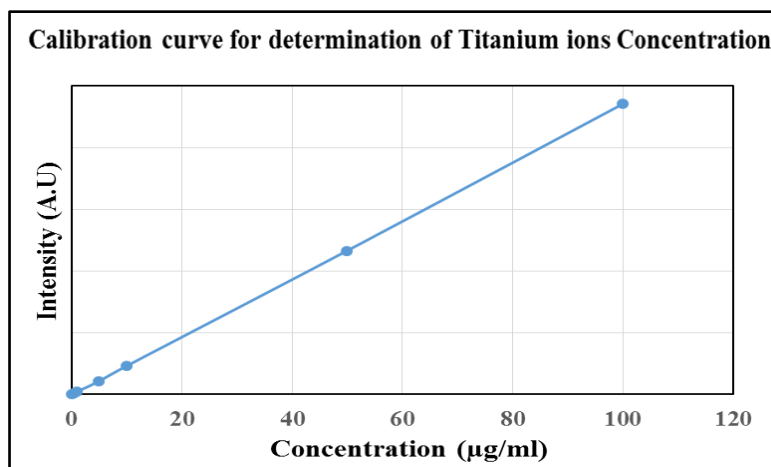

Supplement: s1 [file s1]
